# Supplementary material
Source: PubMed Central journal article supplement (PMC4286151)
Supplement: pr500718t_si_001.pdf [file pr500718t_si_001.pdf]

Table S1. Proteins not represented on the proteome array

| ORF ID   | Accession   | JCVI main role annotation                          | COG | Signal peptide prediction | Number of TM domains | Sub-cellular localization |
|----------|-------------|----------------------------------------------------|-----|---------------------------|----------------------|---------------------------|
| LIC10889 | YP_000866.1 | Cell envelope                                      | M   | No                        | 1                    | Unknown                   |
| LIC11008 | YP_000981.1 | Protein fate                                       | M   | No                        | 2                    | Cytoplasmic               |
| LIC11109 | YP_001079.1 | Unclassified                                       | -   | No                        | 0                    | OuterMembrane             |
| LIC11352 | YP_001316.1 | Unclassified                                       | -   | Yes                       | 1                    | Unknown                   |
| LIC11364 | YP_001328.1 | Energy metabolism                                  | R   | No                        | 0                    | Cytoplasmic               |
| LIC11885 | YP_001834.1 | Cell envelope                                      | -   | Yes                       | 0                    | Unknown                   |
| LIC12227 | YP_002162.1 | Purines, pyrimidines, nucleosides, and nucleotides | -   | Yes                       | 0                    | Unknown                   |
| LIC12322 | YP_002256.1 | Energy metabolism                                  | I   | No                        | 0                    | Cytoplasmic               |
| LIC13131 | YP_003039.1 | Hypothetical proteins                              | -   | Yes                       | 0                    | Unknown                   |
| LIC20250 | YP_003634.1 | Cell envelope                                      | M   | No                        | 1                    | OuterMembrane             |
| LIC20254 | YP_003638.1 | Regulatory functions                               | TK  | No                        | 0                    | Cytoplasmic               |
| LIC10415 | YP_000401.1 | Hypothetical proteins                              | -   | No                        | 0                    | Cytoplasmic               |
| LIC20044 | YP_003436.1 | Protein fate                                       | O   | No                        | 0                    | Cytoplasmic               |
| LIC13136 | YP_003044.1 | Fatty acid and phospholipid metabolism             | I   | No                        | 0                    | Cytoplasmic               |
| LIC11791 | YP_001743.1 | DNA metabolism                                     | KL  | No                        | 0                    | Cytoplasmic               |
| LIC10772 | YP_000752.1 | Hypothetical proteins                              | -   | Yes                       | 1                    | Unknown                   |
| LIC10037 | YP_000037.1 | Central intermediary metabolism                    | E   | No                        | 0                    | Unknown                   |
| LIC11499 | YP_001460.1 | Hypothetical proteins                              | -   | No                        | 0                    | Unknown                   |
| LIC11898 | YP_001847.1 | Energy metabolism                                  | C   | No                        | 0                    | Cytoplasmic               |
| LIC10958 | YP_000932.1 | Energy metabolism                                  | CR  | No                        | 0                    | Cytoplasmic               |
| LIC11620 | YP_001578.1 | DNA metabolism                                     | L   | No                        | 0                    | Cytoplasmic               |
| LIC11707 | YP_001659.1 | Energy metabolism                                  | G   | No                        | 0                    | Cytoplasmic               |
| LIC10838 | YP_000815.1 | Energy metabolism                                  | R   | No                        | 0                    | Cytoplasmic               |
| LIC12414 | YP_002345.1 | Hypothetical proteins                              | -   | No                        | 0                    | Unknown                   |

|          |             |                                                            |    |     |   |                     |
|----------|-------------|------------------------------------------------------------|----|-----|---|---------------------|
| LIC12958 | YP_002871.1 | Hypothetical proteins                                      | -  | No  | 0 | Unknown             |
| LIC11423 | YP_001385.1 | Transcription                                              | R  | No  | 0 | Unknown             |
| LIC12744 | YP_002664.1 | Energy metabolism                                          | C  | No  | 0 | Cytoplasmic         |
| LIC12251 | YP_002186.1 | Biosynthesis of cofactors, prosthetic groups, and carriers | H  | No  | 0 | Cytoplasmic         |
| LIC13194 | YP_003102.1 | Energy metabolism                                          | E  | No  | 0 | Unknown             |
| LIC11500 | YP_001461.1 | Protein fate                                               | J  | No  | 0 | Cytoplasmic         |
| LIC10712 | YP_000696.1 | Energy metabolism                                          | C  | No  | 1 | Unknown             |
| LIC11851 | YP_001800.1 | Protein synthesis                                          | -  | Yes | 1 | OuterMembrane       |
| LIC12679 | YP_002601.1 | Biosynthesis of cofactors, prosthetic groups, and carriers | H  | No  | 0 | Cytoplasmic         |
| LIC11854 | YP_001803.1 | Cell envelope                                              | R  | No  | 0 | Cytoplasmic         |
| LIC11989 | YP_001928.1 | Unclassified                                               | G  | Yes | 1 | Unknown             |
| LIC10163 | YP_000155.1 | Hypothetical proteins                                      | -  | No  | 0 | Cytoplasmic         |
| LIC10241 | YP_000232.1 | Hypothetical proteins                                      | -  | No  | 0 | Cytoplasmic         |
| LIC11514 | YP_001473.1 | Hypothetical proteins                                      | -  | No  | 0 | Cytoplasmic         |
| LIC12331 | YP_002263.1 | Energy metabolism                                          | G  | Yes | 0 | Cytoplasmic         |
| LIC12675 | YP_002597.1 | Hypothetical proteins                                      | -  | No  | 0 | Cytoplasmic         |
| LIC13261 | YP_003168.1 | Cell envelope                                              | R  | No  | 0 | Cytoplasmic         |
| LIC20156 | YP_003547.1 | Unclassified                                               | S  | No  | 0 | Unknown             |
| LIC11134 | YP_001104.2 | Central intermediary metabolism                            | BQ | No  | 0 | Cytoplasmic         |
| LIC10434 | YP_000419.1 | Hypothetical proteins                                      | -  | Yes | 0 | Unknown             |
| LIC10723 | YP_000707.1 | Cellular processes                                         | N  | No  | 0 | Periplasmic         |
| LIC11062 | YP_001032.1 | Central intermediary metabolism                            | -  | No  | 0 | Cytoplasmic         |
| LIC20192 | YP_003583.1 | Unclassified                                               | R  | Yes | 0 | Extracellular       |
| LIC11433 | YP_001395.1 | Regulatory functions                                       | T  | No  | 0 | Cytoplasmic         |
| LIC13032 | YP_002945.1 | Hypothetical proteins                                      | -  | No  | 1 | Unknown             |
| LIC12646 | YP_002569.1 | Protein fate                                               | M  | No  | 1 | CytoplasmicMembrane |
| LIC10298 | YP_000288.1 | Cellular processes                                         | N  | No  | 0 | Periplasmic         |
| LIC12993 | YP_002906.1 | Hypothetical proteins                                      | -  | Yes | 1 | CytoplasmicMembrane |

|          |             |                                                    |   |     |   |                     |
|----------|-------------|----------------------------------------------------|---|-----|---|---------------------|
| LIC10021 | YP_000021.1 | Cell envelope                                      | - | Yes | 0 | Unknown             |
| LIC10137 | YP_000133.1 | Unclassified                                       | O | No  | 0 | Unknown             |
| LIC10417 | YP_000403.1 | Hypothetical proteins                              | - | No  | 0 | Unknown             |
| LIC10774 | YP_000754.1 | Cell envelope                                      | - | Yes | 0 | Unknown             |
| LIC10784 | YP_000763.1 | No Data                                            | - | No  | 0 | Unknown             |
| LIC10785 | YP_000764.1 | Mobile and extrachromosomal element functions      | L | No  | 0 | Unknown             |
| LIC10865 | YP_000842.1 | Unclassified                                       | S | Yes | 1 | Unknown             |
| LIC11033 | YP_001003.1 | Hypothetical proteins                              | - | No  | 1 | Unknown             |
| LIC11225 | YP_001194.1 | No Data                                            | - | No  | 0 | Unknown             |
| LIC11242 | YP_001211.1 | Energy metabolism                                  | C | No  | 0 | Cytoplasmic         |
| LIC11305 | YP_001271.1 | Hypothetical proteins                              | H | No  | 0 | Cytoplasmic         |
| LIC11306 | YP_001272.1 | Hypothetical proteins                              | S | No  | 1 | Unknown             |
| LIC11321 | YP_001287.1 | Hypothetical proteins                              | - | Yes | 1 | Unknown             |
| LIC11382 | YP_001346.1 | Hypothetical proteins                              | - | No  | 0 | Unknown             |
| LIC11432 | YP_001394.1 | Regulatory functions                               | T | No  | 0 | CytoplasmicMembrane |
| LIC11587 | YP_001546.1 | Purines, pyrimidines, nucleosides, and nucleotides | F | No  | 0 | Cytoplasmic         |
| LIC11690 | YP_001642.1 | Hypothetical proteins                              | - | Yes | 1 | Unknown             |
| LIC11760 | YP_001712.1 | Protein synthesis                                  | J | No  | 0 | Cytoplasmic         |
| LIC11995 | YP_001934.1 | Hypothetical proteins                              | - | No  | 0 | Unknown             |
| LIC12111 | YP_002045.2 | Protein synthesis                                  | J | No  | 0 | Cytoplasmic         |
| LIC12159 | YP_002094.1 | Hypothetical proteins                              | - | No  | 0 | Cytoplasmic         |
| LIC12249 | YP_002184.1 | Hypothetical proteins                              | - | No  | 1 | Cytoplasmic         |
| LIC12385 | YP_002317.1 | No Data                                            | - | No  | 1 | Unknown             |
| LIC12525 | YP_002453.1 | Cell envelope                                      | - | Yes | 0 | Unknown             |
| LIC12558 | YP_002485.1 | Cell envelope                                      | - | Yes | 0 | Unknown             |
| LIC12637 | YP_002560.1 | Protein synthesis                                  | J | No  | 0 | Cytoplasmic         |
| LIC12839 | YP_002755.1 | Purines, pyrimidines, nucleosides, and nucleotides | F | No  | 0 | Cytoplasmic         |
| LIC12855 | YP_002771.1 | Protein synthesis                                  | J | No  | 0 | Unknown             |

|          |                |                                                            |    |     |    |                     |
|----------|----------------|------------------------------------------------------------|----|-----|----|---------------------|
| LIC12860 | YP_002776.1    | No Data                                                    | J  | No  | 0  | Cytoplasmic         |
| LIC12865 | YP_002781.1    | Protein synthesis                                          | -  | No  | 0  | Unknown             |
| LIC13013 | YP_002926.1    | No Data                                                    | -  | No  | 0  | Unknown             |
| LIC13034 | YP_002947.1    | No Data                                                    | -  | No  | 0  | Unknown             |
| LIC13109 | YP_003018.1    | Hypothetical proteins                                      | R  | No  | 0  | Cytoplasmic         |
| LIC13163 | YP_003071.1    | Biosynthesis of cofactors, prosthetic groups, and carriers | H  | No  | 0  | Cytoplasmic         |
| LIC13182 | YP_003090.1    | Energy metabolism                                          | C  | No  | 0  | Cytoplasmic         |
| LIC13221 | YP_003129.1    | Energy metabolism                                          | O  | No  | 0  | Cytoplasmic         |
| LIC13391 | YP_003294.1    | No Data                                                    | -  | No  | 0  | Unknown             |
| LIC13422 | YP_003325.1    | Energy metabolism                                          | CP | No  | 12 | CytoplasmicMembrane |
| LIC14000 | YP_003858659.1 |                                                            | -  | No  | 0  | Unknown             |
| LIC20065 | YP_003457.1    | Fatty acid and phospholipid metabolism                     | IQ | No  | 0  | Cytoplasmic         |
| LIC20263 | YP_003647.1    | No Data                                                    | -  | Yes | 0  | CytoplasmicMembrane |
| LIC20300 | YP_003858670.1 |                                                            | -  | No  | 0  | Unknown             |
| LIC12693 | YP_002614.1    | Cell envelope                                              | MU | Yes | 0  | Unknown             |
| LIC13301 | YP_003206.1    | Fatty acid and phospholipid metabolism                     | I  | No  | 0  | Unknown             |
| LIC10583 | YP_000567.1    | Fatty acid and phospholipid metabolism                     | I  | No  | 0  | Cytoplasmic         |
| LIC13009 | YP_002922.1    | Fatty acid and phospholipid metabolism                     | I  | No  | 0  | Cytoplasmic         |
| LIC10445 | YP_000430.1    | Central intermediary metabolism                            | M  | No  | 0  | Cytoplasmic         |
| LIC11571 | YP_001530.1    | Protein fate                                               | NU | No  | 0  | Cytoplasmic         |
| LIC20175 | YP_003566.1    | Protein fate                                               | T  | No  | 0  | Cytoplasmic         |
| LIC12026 | YP_001964.1    | Biosynthesis of cofactors, prosthetic groups, and carriers | H  | No  | 0  | Cytoplasmic         |
| LIC12535 | YP_002463.1    | Biosynthesis of cofactors, prosthetic groups, and carriers | H  | No  | 0  | Cytoplasmic         |
| LIC11602 | YP_001560.1    | Unclassified                                               | G  | No  | 0  | Unknown             |
| LIC13020 | YP_002933.2    | Hypothetical proteins                                      | -  | No  | 0  | Cytoplasmic         |
| LIC10641 | YP_000625.1    | Fatty acid and phospholipid metabolism                     | T  | No  | 0  | CytoplasmicMembrane |
| LIC20259 | YP_003643.1    | Hypothetical proteins                                      | -  | No  | 0  | Cytoplasmic         |
| LIC10485 | YP_000469.1    | Unclassified                                               | -  | No  | 0  | Cytoplasmic         |

|          |             |                                                    |   |     |   |                     |
|----------|-------------|----------------------------------------------------|---|-----|---|---------------------|
| LIC13110 | YP_003019.1 | Regulatory functions                               | T | No  | 0 | CytoplasmicMembrane |
| LIC12700 | YP_002621.1 | Protein fate                                       | R | No  | 0 | Unknown             |
| LIC12163 | YP_002098.1 | Purines, pyrimidines, nucleosides, and nucleotides | O | No  | 0 | Cytoplasmic         |
| LIC12785 | YP_002702.1 | Unknown function                                   | R | No  | 0 | Cytoplasmic         |
| LIC12302 | YP_002236.1 | Protein fate                                       | O | No  | 0 | Extracellular       |
| LIC13280 | YP_003187.1 | Unknown function                                   | I | No  | 0 | Unknown             |
| LIC10668 | YP_000652.1 | Unclassified                                       | V | No  | 0 | Cytoplasmic         |
| LIC13457 | YP_003360.1 | Hypothetical proteins                              | - | No  | 3 | CytoplasmicMembrane |
| LIC10561 | YP_000545.1 | Hypothetical proteins                              | - | Yes | 0 | Extracellular       |
| LIC11773 | YP_001725.1 | Amino acid biosynthesis                            | E | No  | 0 | Cytoplasmic         |
| LIC10376 | YP_000362.1 | Hypothetical proteins                              | R | No  | 3 | CytoplasmicMembrane |
| LIC10454 | YP_000438.1 | Hypothetical proteins                              | R | No  | 0 | Cytoplasmic         |
| LIC13389 | YP_003292.1 | DNA metabolism                                     | L | No  | 3 | CytoplasmicMembrane |
| LIC12428 | YP_002359.1 | Transport and binding proteins                     | V | No  | 0 | CytoplasmicMembrane |
| LIC12692 | YP_002613.1 | Purines, pyrimidines, nucleosides, and nucleotides | O | No  | 0 | Cytoplasmic         |
| LIC10139 | YP_000135.1 | Fatty acid and phospholipid metabolism             | T | No  | 0 | Cytoplasmic         |
| LIC10154 | YP_000147.1 | Protein synthesis                                  | J | No  | 0 | Cytoplasmic         |
| LIC10309 | YP_000299.1 | Energy metabolism                                  | E | No  | 0 | Cytoplasmic         |
| LIC10689 | YP_000673.1 | Energy metabolism                                  | P | No  | 0 | Cytoplasmic         |
| LIC10767 | YP_000747.1 | Hypothetical proteins                              | - | No  | 0 | Unknown             |
| LIC10821 | YP_000798.1 | Cell envelope                                      | - | Yes | 0 | Unknown             |
| LIC10882 | YP_000859.1 | Hypothetical proteins                              | - | No  | 0 | OuterMembrane       |
| LIC10943 | YP_000917.1 | Mobile and extrachromosomal element functions      | L | No  | 0 | Cytoplasmic         |
| LIC10998 | YP_000972.1 | Hypothetical proteins                              | - | No  | 0 | OuterMembrane       |
| LIC11172 | YP_001142.1 | Hypothetical proteins                              | - | No  | 0 | Cytoplasmic         |
| LIC11215 | YP_001184.1 | No Data                                            | - | No  | 0 | Unknown             |
| LIC11243 | YP_001212.1 | Energy metabolism                                  | C | No  | 0 | Cytoplasmic         |
| LIC11502 | YP_001463.1 | Hypothetical proteins                              | - | No  | 0 | Unknown             |

|          |             |                                                    |   |     |   |                     |
|----------|-------------|----------------------------------------------------|---|-----|---|---------------------|
| LIC11540 | YP_001499.1 | Purines, pyrimidines, nucleosides, and nucleotides | F | No  | 0 | Cytoplasmic         |
| LIC11827 | YP_001778.1 | Protein fate                                       | M | No  | 0 | Cytoplasmic         |
| LIC11867 | YP_001816.1 | Cell envelope                                      | M | No  | 0 | Cytoplasmic         |
| LIC12234 | YP_002169.1 | Transport and binding proteins                     | - | No  | 0 | Extracellular       |
| LIC12462 | YP_002390.1 | Protein synthesis                                  | J | No  | 0 | Cytoplasmic         |
| LIC12472 | YP_002400.1 | Central intermediary metabolism                    | - | No  | 0 | Cytoplasmic         |
| LIC12634 | YP_002557.1 | Hypothetical proteins                              | - | No  | 0 | Cytoplasmic         |
| LIC12711 | YP_002632.1 | No Data                                            | E | No  | 0 | Cytoplasmic         |
| LIC12912 | YP_002828.1 | Mobile and extrachromosomal element functions      | - | No  | 0 | Cytoplasmic         |
| LIC12914 | YP_002830.1 | No Data                                            | L | No  | 0 | Unknown             |
| LIC12970 | YP_002883.1 | Cellular processes                                 | D | No  | 0 | Cytoplasmic         |
| LIC13148 | YP_003056.1 | Hypothetical proteins                              | - | No  | 0 | Cytoplasmic         |
| LIC13177 | YP_003085.1 | DNA metabolism                                     | - | No  | 0 | Cytoplasmic         |
| LIC13252 | YP_003159.1 | Energy metabolism                                  | C | No  | 0 | Cytoplasmic         |
| LIC13305 | YP_003210.1 | Cell envelope                                      | - | Yes | 0 | Unknown             |
| LIC13349 | YP_003254.1 | Hypothetical proteins                              | - | No  | 1 | Unknown             |
| LIC13427 | YP_003330.1 | No Data                                            | T | No  | 1 | Unknown             |
| LIC20180 | YP_003571.1 | Regulatory functions                               | T | No  | 0 | CytoplasmicMembrane |
| LIC12357 | YP_002289.1 | Unknown function                                   | T | No  | 0 | CytoplasmicMembrane |
| LIC12616 | YP_002539.1 | Hypothetical proteins                              | - | No  | 0 | Unknown             |
| LIC10396 | YP_000382.1 | Fatty acid and phospholipid metabolism             | I | No  | 0 | Cytoplasmic         |
| LIC10522 | YP_000506.1 | Energy metabolism                                  | R | No  | 0 | Cytoplasmic         |
| LIC20209 | YP_003598.1 | Fatty acid and phospholipid metabolism             | I | No  | 0 | Cytoplasmic         |
| LIC11555 | YP_001514.2 | Protein synthesis                                  | J | No  | 0 | Cytoplasmic         |
| LIC12551 | YP_002478.1 | Fatty acid and phospholipid metabolism             | I | No  | 0 | Cytoplasmic         |
| LIC12027 | YP_001965.1 | Fatty acid and phospholipid metabolism             | Q | No  | 0 | Cytoplasmic         |
| LIC10538 | YP_000522.1 | Transport and binding proteins                     | R | No  | 0 | Cytoplasmic         |
| LIC13219 | YP_003127.2 | Protein synthesis                                  | J | No  | 0 | Cytoplasmic         |

|          |             |                                 |    |     |    |                     |
|----------|-------------|---------------------------------|----|-----|----|---------------------|
| LIC12792 | YP_002709.1 | Central intermediary metabolism | K  | No  | 0  | Cytoplasmic         |
| LIC11067 | YP_001037.1 | Unknown function                | M  | No  | 0  | Unknown             |
| LIC10344 | YP_000334.1 | Transcription                   | T  | No  | 0  | Unknown             |
| LIC11741 | YP_001693.1 | Regulatory functions            | R  | No  | 0  | Cytoplasmic         |
| LIC10222 | YP_000213.1 | DNA metabolism                  | L  | No  | 0  | Cytoplasmic         |
| LIC11536 | YP_001495.1 | Unclassified                    | M  | Yes | 0  | Unknown             |
| LIC13372 | YP_003277.1 | Central intermediary metabolism | EH | No  | 0  | Cytoplasmic         |
| LIC12173 | YP_002108.1 | Cell envelope                   | M  | No  | 0  | Cytoplasmic         |
| LIC13464 | YP_003367.1 | Protein fate                    | E  | No  | 0  | Unknown             |
| LIC13021 | YP_002934.1 | Hypothetical proteins           | T  | No  | 0  | Unknown             |
| LIC10662 | YP_000646.1 | Hypothetical proteins           | -  | Yes | 1  | CytoplasmicMembrane |
| LIC11811 | YP_001762.1 | Unclassified                    | M  | No  | 0  | Cytoplasmic         |
| LIC13331 | YP_003236.1 | Regulatory functions            | T  | No  | 0  | CytoplasmicMembrane |
| LIC12268 | YP_002203.1 | Energy metabolism               | C  | No  | 1  | Cytoplasmic         |
| LIC13147 | YP_003055.1 | Protein fate                    | R  | No  | 0  | Cytoplasmic         |
| LIC12371 | YP_002303.1 | Hypothetical proteins           | -  | No  | 0  | Cytoplasmic         |
| LIC11844 | YP_001793.1 | Unclassified                    | O  | No  | 2  | Cytoplasmic         |
| LIC10040 | YP_000040.1 | Cell envelope                   | M  | No  | 0  | Cytoplasmic         |
| LIC10068 | YP_000068.1 | Hypothetical proteins           | -  | No  | 0  | Unknown             |
| LIC12600 | YP_002523.1 | Hypothetical proteins           | -  | No  | 0  | Cytoplasmic         |
| LIC10678 | YP_000662.1 | Regulatory functions            | TK | No  | 0  | Cytoplasmic         |
| LIC13077 | YP_002989.1 | Hypothetical proteins           | R  | No  | 0  | Cytoplasmic         |
| LIC11311 | YP_001277.1 | Unclassified                    | I  | No  | 0  | Unknown             |
| LIC11421 | YP_001383.1 | Energy metabolism               | P  | No  | 11 | CytoplasmicMembrane |
| LIC12014 | YP_001953.1 | Hypothetical proteins           | -  | No  | 0  | Cytoplasmic         |
| LIC12298 | YP_002232.1 | Hypothetical proteins           | -  | No  | 0  | Unknown             |
| LIC11879 | YP_001828.1 | Hypothetical proteins           | S  | No  | 0  | Cytoplasmic         |
| LIC12178 | YP_002113.1 | Cell envelope                   | -  | Yes | 9  | CytoplasmicMembrane |

|          |             |                                                            |     |     |   |                     |
|----------|-------------|------------------------------------------------------------|-----|-----|---|---------------------|
| LIC13302 | YP_003207.1 | Hypothetical proteins                                      | -   | No  | 4 | CytoplasmicMembrane |
| LIC12097 | YP_002031.1 | Regulatory functions                                       | T   | No  | 0 | CytoplasmicMembrane |
| LIC12539 | YP_002467.1 | Hypothetical proteins                                      | -   | Yes | 1 | Extracellular       |
| LIC10323 | YP_000313.1 | Energy metabolism                                          | G   | No  | 0 | Cytoplasmic         |
| LIC11045 | YP_001015.1 | Regulatory functions                                       | T   | No  | 0 | Cytoplasmic         |
| LIC11390 | YP_001353.1 | Cellular processes                                         | NUO | No  | 0 | Cytoplasmic         |
| LIC11624 | YP_001582.1 | DNA metabolism                                             | L   | No  | 0 | Cytoplasmic         |
| LIC10051 | YP_000051.1 | Biosynthesis of cofactors, prosthetic groups, and carriers | H   | No  | 0 | Cytoplasmic         |
| LIC20222 | YP_003611.1 | Hypothetical proteins                                      | R   | No  | 0 | Cytoplasmic         |
| LIC10950 | YP_000924.1 | Regulatory functions                                       | TK  | No  | 0 | Cytoplasmic         |
| LIC13218 | YP_003126.1 | Unclassified                                               | R   | No  | 0 | Cytoplasmic         |
| LIC10161 | YP_000153.1 | Hypothetical proteins                                      | -   | No  | 0 | Cytoplasmic         |
| LIC10227 | YP_000218.1 | Hypothetical proteins                                      | S   | No  | 0 | Cytoplasmic         |
| LIC13118 | YP_003027.1 | Cell envelope                                              | M   | No  | 0 | Cytoplasmic         |
| LIC10529 | YP_000513.1 | Unclassified                                               | S   | No  | 0 | Cytoplasmic         |
| LIC11748 | YP_001700.1 | Hypothetical proteins                                      | -   | No  | 0 | Cytoplasmic         |
| LIC12019 | YP_001957.1 | Transcription                                              | KL  | No  | 0 | Cytoplasmic         |
| LIC10200 | YP_000191.1 | Protein fate                                               | M   | No  | 0 | Cytoplasmic         |
| LIC10131 | YP_000127.1 | Protein synthesis                                          | D   | No  | 0 | Cytoplasmic         |
| LIC10189 | YP_000180.1 | Hypothetical proteins                                      | -   | No  | 0 | Unknown             |
| LIC10083 | YP_000082.1 | Hypothetical proteins                                      | -   | No  | 3 | CytoplasmicMembrane |
| LIC10217 | YP_000208.1 | No Data                                                    | -   | No  | 2 | CytoplasmicMembrane |
| LIC10255 | YP_000246.1 | Protein fate                                               | O   | No  | 0 | Cytoplasmic         |
| LIC10448 | YP_000432.1 | Protein synthesis                                          | J   | No  | 0 | Cytoplasmic         |
| LIC10563 | YP_000547.1 | Unclassified                                               | R   | No  | 1 | CytoplasmicMembrane |
| LIC10639 | YP_000623.1 | Hypothetical proteins                                      | -   | Yes | 0 | Extracellular       |
| LIC10688 | YP_000672.1 | Energy metabolism                                          | -   | No  | 3 | CytoplasmicMembrane |
| LIC10762 | YP_000742.1 | Protein synthesis                                          | J   | No  | 0 | Cytoplasmic         |

|          |             |                                                            |     |     |    |                     |
|----------|-------------|------------------------------------------------------------|-----|-----|----|---------------------|
| LIC10807 | YP_000784.1 | Central intermediary metabolism                            | O   | No  | 0  | Cytoplasmic         |
| LIC10867 | YP_000844.1 | Hypothetical proteins                                      | -   | No  | 0  | Unknown             |
| LIC10917 | YP_000892.1 | Hypothetical proteins                                      | -   | No  | 0  | Unknown             |
| LIC10955 | YP_000929.1 | Biosynthesis of cofactors, prosthetic groups, and carriers | I   | No  | 0  | Cytoplasmic         |
| LIC11002 | YP_000975.1 | Mobile and extrachromosomal element functions              | -   | No  | 0  | Unknown             |
| LIC11126 | YP_001096.1 | Unknown function                                           | T   | No  | 0  | Cytoplasmic         |
| LIC11178 | YP_001148.1 | Hypothetical proteins                                      | -   | Yes | 0  | Cytoplasmic         |
| LIC11226 | YP_001195.1 | Hypothetical proteins                                      | -   | No  | 4  | CytoplasmicMembrane |
| LIC11269 | YP_001238.1 | No Data                                                    | -   | No  | 0  | Unknown             |
| LIC11308 | YP_001274.1 | Amino acid biosynthesis                                    | E   | No  | 0  | Cytoplasmic         |
| LIC11322 | YP_001288.1 | Hypothetical proteins                                      | -   | No  | 0  | Unknown             |
| LIC11323 | YP_001289.1 | DNA metabolism                                             | -   | No  | 0  | Unknown             |
| LIC11339 | YP_001303.1 | DNA metabolism                                             | L   | No  | 0  | Cytoplasmic         |
| LIC11497 | YP_001458.1 | Central intermediary metabolism                            |     | No  | 0  | Cytoplasmic         |
| LIC11717 | YP_001669.1 | DNA metabolism                                             | L   | No  | 0  | Cytoplasmic         |
| LIC11746 | YP_001698.1 | Amino acid biosynthesis                                    | E   | No  | 0  | Cytoplasmic         |
| LIC11774 | YP_001726.1 | DNA metabolism                                             | L   | No  | 0  | Cytoplasmic         |
| LIC12335 | YP_002267.1 | Purines, pyrimidines, nucleosides, and nucleotides         | E   | No  | 0  | Cytoplasmic         |
| LIC12370 | YP_002302.1 | Transcription                                              | -   | No  | 0  | Unknown             |
| LIC12386 | YP_002318.1 | Unclassified                                               | GER | No  | 10 | CytoplasmicMembrane |
| LIC12406 | YP_002338.1 | Hypothetical proteins                                      | -   | No  | 0  | Cytoplasmic         |
| LIC12417 | YP_002348.1 | Unknown function                                           | R   | No  | 0  | Cytoplasmic         |
| LIC12461 | YP_002389.1 | Protein synthesis                                          | J   | No  | 0  | Cytoplasmic         |
| LIC12650 | YP_002573.1 | Hypothetical proteins                                      | -   | No  | 0  | Cytoplasmic         |
| LIC12670 | YP_002592.1 | Unclassified                                               | T   | No  | 2  | CytoplasmicMembrane |
| LIC12688 | YP_002609.1 | DNA metabolism                                             | L   | No  | 0  | Cytoplasmic         |
| LIC12697 | YP_002618.1 | Hypothetical proteins                                      | -   | No  | 0  | Unknown             |
| LIC12750 | YP_002670.1 | Energy metabolism                                          | CP  | No  | 15 | CytoplasmicMembrane |

|          |                |                                                            |    |     |    |                     |
|----------|----------------|------------------------------------------------------------|----|-----|----|---------------------|
| LIC12752 | YP_002672.1    | Energy metabolism                                          | C  | No  | 11 | CytoplasmicMembrane |
| LIC12753 | YP_002673.1    | Hypothetical proteins                                      | -  | No  | 0  | Unknown             |
| LIC12784 | YP_002701.1    | Cell envelope                                              | -  | No  | 0  | Unknown             |
| LIC12825 | YP_002741.1    | Unclassified                                               | E  | No  | 0  | Unknown             |
| LIC12869 | YP_002785.1    | Protein synthesis                                          | J  | No  | 0  | Cytoplasmic         |
| LIC13081 | YP_002993.1    | Hypothetical proteins                                      | -  | No  | 0  | Unknown             |
| LIC13129 | YP_003037.1    | Protein synthesis                                          | J  | No  | 0  | Cytoplasmic         |
| LIC13291 | YP_003198.1    | Central intermediary metabolism                            | R  | No  | 1  | Unknown             |
| LIC13304 | YP_003209.1    | Hypothetical proteins                                      | -  | No  | 0  | Unknown             |
| LIC13317 | YP_003222.1    | Hypothetical proteins                                      | -  | No  | 0  | Cytoplasmic         |
| LIC13320 | YP_003225.1    | Protein fate                                               | E  | No  | 0  | Extracellular       |
| LIC13322 | YP_003227.1    | Protein fate                                               | E  | Yes | 0  | Extracellular       |
| LIC13430 | YP_003333.1    | Unclassified                                               | G  | No  | 0  | Cytoplasmic         |
| LIC13468 | YP_003370.1    | Hypothetical proteins                                      | -  | No  | 0  | Unknown             |
| LIC14005 | YP_003858660.1 |                                                            | -  | No  | 0  | Unknown             |
| LIC20255 | YP_003639.1    | Hypothetical proteins                                      | -  | No  | 0  | Cytoplasmic         |
| LIC10382 | YP_000368.1    | Fatty acid and phospholipid metabolism                     | I  | No  | 0  | Cytoplasmic         |
| LIC10543 | YP_000527.1    | Fatty acid and phospholipid metabolism                     | I  | No  | 0  | Cytoplasmic         |
| LIC11173 | YP_001143.1    | Unknown function                                           | L  | No  | 0  | Cytoplasmic         |
| LIC12505 | YP_002433.1    | Regulatory functions                                       | T  | No  | 0  | CytoplasmicMembrane |
| LIC12762 | YP_002682.1    | Hypothetical proteins                                      | T  | No  | 0  | Cytoplasmic         |
| LIC20198 | YP_003587.1    | Hypothetical proteins                                      | T  | No  | 0  | Cytoplasmic         |
| LIC11257 | YP_001226.1    | Central intermediary metabolism                            | FP | No  | 0  | Cytoplasmic         |
| LIC12350 | YP_002282.1    | Protein synthesis                                          | J  | No  | 0  | Cytoplasmic         |
| LIC13448 | YP_003351.1    | Regulatory functions                                       | T  | No  | 0  | Unknown             |
| LIC10174 | YP_000166.1    | Hypothetical proteins                                      | -  | No  | 0  | Unknown             |
| LIC10896 | YP_000873.1    | Transport and binding proteins                             | P  | Yes | 0  | OuterMembrane       |
| LIC20009 | YP_003401.1    | Biosynthesis of cofactors, prosthetic groups, and carriers | H  | No  | 0  | Cytoplasmic         |

|          |             |                                                    |    |     |    |                     |
|----------|-------------|----------------------------------------------------|----|-----|----|---------------------|
| LIC12701 | YP_002622.1 | Transcription                                      | J  | No  | 0  | Cytoplasmic         |
| LIC12421 | YP_002352.1 | Hypothetical proteins                              | R  | No  | 0  | Cytoplasmic         |
| LIC12205 | YP_002140.1 | Unclassified                                       | MG | No  | 0  | Cytoplasmic         |
| LIC11483 | YP_001444.1 | Unknown function                                   | L  | No  | 0  | Cytoplasmic         |
| LIC20088 | YP_003480.1 | Unclassified                                       | G  | No  | 0  | Cytoplasmic         |
| LIC10151 | YP_000145.1 | Hypothetical proteins                              | -  | No  | 2  | Cytoplasmic         |
| LIC12536 | YP_002464.1 | Unclassified                                       | H  | No  | 0  | Cytoplasmic         |
| LIC10350 | YP_000339.1 | Hypothetical proteins                              | T  | No  | 0  | Unknown             |
| LIC12413 | YP_002344.1 | Unclassified                                       | S  | No  | 0  | Unknown             |
| LIC20265 | YP_003649.1 | Hypothetical proteins                              | -  | No  | 0  | Cytoplasmic         |
| LIC13308 | YP_003213.1 | Hypothetical proteins                              | -  | No  | 0  | Cytoplasmic         |
| LIC10322 | YP_000312.1 | Hypothetical proteins                              | -  | No  | 2  | Cytoplasmic         |
| LIC10457 | YP_000441.1 | Hypothetical proteins                              | -  | No  | 0  | Cytoplasmic         |
| LIC10556 | YP_000540.1 | Hypothetical proteins                              | -  | No  | 0  | Unknown             |
| LIC11034 | YP_001004.1 | Hypothetical proteins                              | -  | No  | 0  | Unknown             |
| LIC11246 | YP_001215.1 | Central intermediary metabolism                    | R  | No  | 0  | Extracellular       |
| LIC11248 | YP_001217.1 | Energy metabolism                                  | M  | No  | 11 | CytoplasmicMembrane |
| LIC11453 | YP_001414.1 | Amino acid biosynthesis                            | E  | No  | 0  | Cytoplasmic         |
| LIC11460 | YP_001421.1 | Protein synthesis                                  | J  | No  | 0  | Cytoplasmic         |
| LIC11558 | YP_001517.1 | Protein synthesis                                  | J  | No  | 0  | Cytoplasmic         |
| LIC11647 | YP_001605.1 | Protein synthesis                                  | J  | No  | 0  | Cytoplasmic         |
| LIC11655 | YP_001611.1 | Purines, pyrimidines, nucleosides, and nucleotides | F  | No  | 0  | Cytoplasmic         |
| LIC11869 | YP_001818.1 | Unknown function                                   | M  | No  | 0  | Cytoplasmic         |
| LIC12025 | YP_001963.1 | Protein synthesis                                  | J  | No  | 0  | Cytoplasmic         |
| LIC12562 | YP_002489.1 | Energy metabolism                                  | PR | No  | 0  | Cytoplasmic         |
| LIC13404 | YP_003307.1 | Unclassified                                       | I  | No  | 0  | Cytoplasmic         |
| LIC20055 | YP_003447.1 | Hypothetical proteins                              | S  | No  | 0  | Cytoplasmic         |
| LIC20110 | YP_003502.1 | Hypothetical proteins                              | -  | Yes | 1  | Unknown             |

|          |             |                       |   |     |   |               |
|----------|-------------|-----------------------|---|-----|---|---------------|
| LIC10464 | YP_000448.1 | Unknown function      | N | Yes | 1 | Unknown       |
| LIC10465 | YP_000449.1 | Unknown function      | - | Yes | 0 | Unknown       |
| LIC11739 | YP_001691.1 | Hypothetical proteins | R | No  | 0 | Unknown       |
| LIC11026 | YP_000996.1 | Hypothetical proteins | - | No  | 1 | OuterMembrane |
| LIC12602 | YP_002525.1 | Hypothetical proteins | - | No  | 0 | Unknown       |
| LIC11755 | YP_001707.1 | Hypothetical proteins | - | No  | 0 | OuterMembrane |
| LIC12048 | YP_001983.1 | Hypothetical proteins | - | No  | 1 | OuterMembrane |

---

Table S2. COG enrichment

| COG | Definition                                                   | Proteins<br>on chip | IgM  |            |          | IgG      |            |          |          |          |
|-----|--------------------------------------------------------------|---------------------|------|------------|----------|----------|------------|----------|----------|----------|
|     |                                                              |                     | Hits | FoldEnrich | p-value  | Hits     | FoldEnrich | p-value  |          |          |
| A   | RNA processing and modification                              | 0                   | 0    | 0.0        | 1.00E+00 | 0        | 0.0        | 1.00E+00 |          |          |
| B   | Chromatin structure and dynamics                             | 2                   | 0    | 0.0        | 1.00E+00 | 0        | 0.0        | 1.00E+00 |          |          |
| C   | Energy production and conversion                             | 119                 | 3    | 0.8        | 1.00E+00 | 1        | 0.2        | 1.30E-01 |          |          |
| D   | Cell division and chromosome partitioning                    | 22                  | 3    | *          | 4.4      | 2.95E-02 | 1          | 1.3      | 5.55E-01 |          |
| E   | Amino acid transport and metabolism                          | 152                 | 1    | 0.2        | 9.08E-02 | 0        | **         | 0.0      | 6.29E-03 |          |
| F   | Nucleotide transport and metabolism                          | 49                  | 1    | 0.7        | 1.00E+00 | 0        | 0.0        | 4.22E-01 |          |          |
| G   | Carbohydrate transport and metabolism                        | 93                  | 1    | 0.3        | 3.69E-01 | 1        | 0.3        | 2.61E-01 |          |          |
| H   | coenzyme metabolism                                          | 122                 | 2    | 0.5        | 5.90E-01 | 3        | 0.7        | 8.02E-01 |          |          |
| I   | Lipid metabolism                                             | 103                 | 1    | 0.3        | 3.78E-01 | 0        | 0.0        | 5.27E-02 |          |          |
| J   | Translation, ribosomal structure and biogenesis              | 148                 | 2    | 0.4        | 3.29E-01 | 1        | 0.2        | 6.59E-02 |          |          |
| K   | Transcription                                                | 110                 | 2    | 0.6        | 5.84E-01 | 2        | 0.5        | 4.38E-01 |          |          |
| L   | DNA replication, recombination and repair                    | 135                 | 1    | 0.2        | 1.29E-01 | 1        | 0.2        | 9.32E-02 |          |          |
| M   | Cell envelope biogenesis, outer membrane                     | 217                 | 5    | 0.7        | 6.85E-01 | 8        | 1.0        | 8.52E-01 |          |          |
| N   | Cell motility and secretion                                  | 90                  | 12   | *          | 4.3      | 1.69E-05 | 12         | *        | 3.7      | 7.32E-05 |
| O   | Posttranslational modification, protein turnover, chaperones | 103                 | 5    | 1.6        | 2.53E-01 | 4        | 1.1        | 7.87E-01 |          |          |
| P   | Inorganic ion transport and metabolism                       | 91                  | 0    | 0.0        | 1.17E-01 | 2        | 0.6        | 7.73E-01 |          |          |
| Q   | Secondary metabolites biosynthesis, transport and catabolism | 28                  | 0    | 0.0        | 1.00E+00 | 0        | 0.0        | 6.24E-01 |          |          |
| R   | General function prediction only                             | 302                 | 5    | 0.5        | 1.65E-01 | 5        | 0.5        | 7.42E-02 |          |          |
| S   | Function unknown                                             | 198                 | 5    | 0.8        | 8.33E-01 | 13       | *          | 1.8      | 2.99E-02 |          |
| T   | Signal transduction mechanisms                               | 220                 | 5    | 0.7        | 6.87E-01 | 5        | 0.6        | 3.52E-01 |          |          |
| U   | Intracellular trafficking and secretion                      | 73                  | 13   | *          | 5.7      | 2.41E-07 | 13         | *        | 4.9      | 1.33E-06 |
| V   | Defense mechanisms                                           | 38                  | 1    | 0.8        | 1.00E+00 | 5        | *          | 3.7      | 1.09E-02 |          |
| W   | Extracellular Structure                                      | 0                   | 0    | 0.0        | 1.00E+00 | 0        | 0.0        | 1.00E+00 |          |          |

|            |                           |      |     |       |          |     |       |          |
|------------|---------------------------|------|-----|-------|----------|-----|-------|----------|
| Y          | Nuclear structure         | 0    | 0   | 0.0   | 1.00E+00 | 0   | 0.0   | 1.00E+00 |
| Z          | Cytoskeleton              | 1    | 0   | 0.0   | 1.00E+00 | 0   | 0.0   | 1.00E+00 |
|            | Not in COGs               | 1469 | 53  | 1.2   | 1.82E-01 | 62  | 1.2   | 7.64E-02 |
| Total ORFs |                           | 3885 | 121 |       |          | 140 |       |          |
|            | True positive rate        | -    |     | 0.231 |          |     | 0.309 |          |
|            | True negative rate        | -    |     | 0.958 |          |     | 0.905 |          |
|            | Positive predictive value | -    |     | 0.151 |          |     | 0.108 |          |
|            | Negative predictive value | -    |     | 0.975 |          |     | 0.973 |          |

\*Enriched category. \*\*Under represented category.

NOTE: Proteins may be included in more than one category.

Table S3. JCVI mainrole enrichment

| JCVI mainrole                                              | Proteins on<br>chip | IgM  |            |          | IgG      |            |          |          |
|------------------------------------------------------------|---------------------|------|------------|----------|----------|------------|----------|----------|
|                                                            |                     | Hits | FoldEnrich | p-value  | Hits     | FoldEnrich | p-value  |          |
| Amino acid biosynthesis                                    | 78                  | 0    | 0.0        | 1.74E-01 | 0        | 0.0        | 1.14E-01 |          |
| Biosynthesis of cofactors, prosthetic groups, and carriers | 92                  | 0    | 0.0        | 1.15E-01 | 1        | 0.3        | 3.79E-01 |          |
| Cell envelope                                              | 322                 | 21   | *          | 2.2      | 4.61E-04 | 26         | * 2.3    | 3.99E-05 |
| Cellular processes                                         | 145                 | 16   | *          | 3.7      | 4.29E-06 | 15         | * 2.9    | 1.32E-04 |
| Central intermediary metabolism                            | 74                  | 2    |            | 0.9      | 1.00E+00 | 2          | 0.8      | 1.00E+00 |
| Disrupted reading frame                                    | 0                   | 0    |            | 0.0      | 1.00E+00 | 0          | 0.0      | 1.00E+00 |
| DNA metabolism                                             | 91                  | 1    |            | 0.4      | 5.25E-01 | 1          | 0.3      | 3.77E-01 |
| Energy metabolism                                          | 228                 | 2    | **         | 0.3      | 6.63E-02 | 3          | 0.4      | 6.27E-02 |
| Fatty acid and phospholipid metabolism                     | 100                 | 2    |            | 0.7      | 7.69E-01 | 1          | 0.3      | 2.64E-01 |
| Gene/protein expression                                    | 0                   | 0    |            | 0.0      | 1.00E+00 | 0          | 0.0      | 1.00E+00 |
| Hypothetical proteins                                      | 1118                | 25   |            | 0.7      | 9.10E-02 | 38         | 1.0      | 8.46E-01 |
| Hypothetical proteins - Conserved                          | 0                   | 0    |            | 0.0      | 1.00E+00 | 0          | 0.0      | 1.00E+00 |
| Metabolism                                                 | 0                   | 0    |            | 0.0      | 1.00E+00 | 0          | 0.0      | 1.00E+00 |
| Mobile and extrachromosomal element functions              | 60                  | 0    |            | 0.0      | 2.63E-01 | 0          | 0.0      | 2.73E-01 |
| Pathogen responses                                         | 0                   | 0    |            | 0.0      | 1.00E+00 | 0          | 0.0      | 1.00E+00 |
| Protein fate                                               | 137                 | 11   | *          | 2.7      | 2.32E-03 | 9          | 1.9      | 5.66E-02 |
| Protein synthesis                                          | 169                 | 7    |            | 1.4      | 3.51E-01 | 5          | 0.8      | 8.33E-01 |
| Purines, pyrimidines, nucleosides, and nucleotides         | 62                  | 1    |            | 0.5      | 1.00E+00 | 0          | 0.0      | 1.72E-01 |
| Regulatory functions                                       | 192                 | 3    |            | 0.5      | 3.78E-01 | 2          | 0.3      | 6.60E-02 |
| Signal transduction                                        | 0                   | 0    |            | 0.0      | 1.00E+00 | 0          | 0.0      | 1.00E+00 |
| Transcription                                              | 61                  | 1    |            | 0.5      | 1.00E+00 | 1          | 0.5      | 7.24E-01 |
| Transport and binding proteins                             | 136                 | 6    |            | 1.5      | 3.00E-01 | 5          | 1.0      | 8.13E-01 |
| Unclassified                                               | 303                 | 7    |            | 0.8      | 5.97E-01 | 11         | 1.0      | 8.70E-01 |

|                           |             |            |       |          |            |       |          |
|---------------------------|-------------|------------|-------|----------|------------|-------|----------|
| Unknown function          | 137         | 4          | 1.0   | 1.00E+00 | 7          | 1.5   | 3.36E-01 |
| Viral functions           | 0           | 0          | 0.0   | 1.00E+00 | 0          | 0.0   | 1.00E+00 |
| Not annotated             | 138         | 0          | 0.0   | 3.51E-02 | 1          | 0.2   | 9.24E-02 |
| <b>Total</b>              | <b>3643</b> | <b>109</b> |       |          | <b>128</b> |       |          |
| True positive rate        | -           |            | 0.44  |          |            | 0.32  |          |
| True negative rate        | -           |            | 0.836 |          |            | 0.879 |          |
| Positive predictive value | -           |            | 0.079 |          |            | 0.088 |          |
| Negative predictive value | -           |            | 0.979 |          |            | 0.973 |          |

\*Enriched category. \*\*Under represented category.

Table S4. Transmembrane domain enrichment

| Transmembrane domains     | Proteins on chip | IgM  |            |         | IgG      |            |         |       |          |
|---------------------------|------------------|------|------------|---------|----------|------------|---------|-------|----------|
|                           |                  | Hits | FoldEnrich | p-value | Hits     | FoldEnrich | p-value |       |          |
| 0                         | 2644             | 60   | **         | 0.8     | 8.21E-05 | 61         | **      | 0.4   | 1.50E-09 |
| 1                         | 492              | 30   | *          | 2.0     | 8.67E-05 | 39         | *       | 1.7   | 4.44E-07 |
| >1                        | 531              | 19   |            | 1.2     | 4.08E-01 | 29         | **      | 0.3   | 1.47E-02 |
| Total                     | 3667             | 109  |            |         |          | 129        |         |       |          |
| True positive rate        | -                |      |            | 0.275   |          |            |         | 0.302 |          |
| True negative rate        | -                |      |            | 0.975   |          |            |         | 0.972 |          |
| Positive predictive value | -                |      |            | 0.275   |          |            |         | 0.302 |          |
| Negative predictive value | -                |      |            | 0.975   |          |            |         | 0.972 |          |

\*Enriched category. \*\*Under represented category.

Table S5. Signal peptide enrichment

| Signal Peptide            | Proteins on chip | IgM  |            |         | IgG      |            |         |       |          |
|---------------------------|------------------|------|------------|---------|----------|------------|---------|-------|----------|
|                           |                  | Hits | FoldEnrich | p-value | Hits     | FoldEnrich | p-value |       |          |
| Score $\geq 0.7$          | 562              | 38   | *          | 2.3     | 5.00E-07 | 47         | *       | 2.4   | 1.92E-09 |
| Score $< 0.7$             | 3105             | 72   | **         | 0.8     | 5.00E-07 | 82         | **      | 0.8   | 1.92E-09 |
| Total                     | 3667             | 109  |            |         |          | 129        |         |       |          |
| True positive rate        | -                |      |            | 0.345   |          |            |         | 0.364 |          |
| True negative rate        | -                |      |            | 0.977   |          |            |         | 0.974 |          |
| Positive predictive value | -                |      |            | 0.345   |          |            |         | 0.364 |          |
| Negative predictive value | -                |      |            | 0.977   |          |            |         | 0.974 |          |

\*Enriched category. \*\*Under represented category.

Table S6. Sub-cellular localization enrichment

| Sub-cellular localization | Proteins on chip | IgM  |            |         | IgG      |            |         |       |          |
|---------------------------|------------------|------|------------|---------|----------|------------|---------|-------|----------|
|                           |                  | Hits | FoldEnrich | p-value | Hits     | FoldEnrich | p-value |       |          |
| Cytoplasmic               | 1675             | 38   | **         | 0.8     | 1.94E-02 | 35         | **      | 0.6   | 1.31E-05 |
| Cytoplasmic Membrane      | 665              | 24   |            | 1.2     | 3.15E-01 | 29         |         | 1.2   | 2.00E-01 |
| Extracellular             | 63               | 3    |            | 1.6     | 4.37E-01 | 6          | *       | 2.7   | 2.22E-02 |
| Outer Membrane            | 62               | 6    | *          | 3.2     | 9.97E-03 | 9          | *       | 4.1   | 2.61E-04 |
| Periplasmic               | 29               | 0    |            | 0       | 1.00E+00 | 0          |         | 0     | 6.24E-01 |
| Unknown                   | 1173             | 38   |            | 1.1     | 6.04E-01 | 50         |         | 1.2   | 1.02E-01 |
| Total                     | 3667             | 109  |            |         |          | 129        |         |       |          |
| True positive rate        | -                |      |            | 0.055   |          |            |         | 0.116 |          |
| True negative rate        | -                |      |            | 0.971   |          |            |         | 0.969 |          |
| Positive predictive value | -                |      |            | 0.055   |          |            |         | 0.12  |          |
| Negative predictive value | -                |      |            | 0.971   |          |            |         | 0.968 |          |

\*Enriched category. \*\*Under represented category.
